# Supplementary material for: ROR1 CAR T cells and lenvatinib cooperatively target anaplastic thyroid carcinoma
Source: Research Square preprint supplement (doi:10.21203/rs.3.rs-8690827/v1), 2026-01-29
Supplement: Supplementary file 1 [file 48b684a04f8db943ec1dc84f.docx]

**Supplementary Material**

**Materials and Methods**

**Cell lines**

HEK293T-cells were obtained from the DSMZ-German Collection of Microorganisms and Cell Cultures (Braunschweig, Germany) and cultivated in Dulbecco’s Modified Eagle’s Medium (DMEM, Thermo Fisher Scientific, Karlsruhe, Germany) supplemented with 10% (v/v) fetal bovine serum (FBS, PAN Biotech, Aidenbach, Germany) and 1 % (v/v) penicillin/streptomycin (Sigma-Aldrich, Taufkirchen, Germany). The ATC derived cell lines SW1736, 8505C and C643 (provided by Dr. Thomas Müller) and the ROR1-negative control cell line A2780 were cultivated in RPMI 1640 (Thermo Fisher Scientific, Karlsruhe, Germany) supplemented with 10 % (v/v) FBS and 1 % (v/v) penicillin/streptomycin. All cell lines were cultivated at 37 °C and 5 % CO2. ATC cell lines were engineered to carry the luciferase vector FULW as previously described.1

**Oligonucleotides and primers**

Primers were designed by NCBI Primer BLAST. All Oligonucleotides were purchased from Biolegio B. V. Sequences can be found in Table S2.

**Bulk mRNA data processing**

RNA processing and sequencing were performed at Novogene (United Kingdom) Company Limited (Cambrigde, GB) with a mean of 30 million reads per sample via paired end sequencing. Raw gene counts were analysed using DESeq2 2 with R version 4.3.2. Genes with zero expression over all samples were discarded. Data was log normalized and variance stabilised and a DESeq object was created. For visualization rlog transformation of the data was performed. Principal component analysis (PCA) was done using function plotPCA. For differential expression testing function DESeq was used and shrinkage of log2 fold changes was performed with function lfcShrink and estimator apeglm.3 The resulting gene lists were filtered for genes at least differing with a log 2 fold change of 0.58 and an adjusted pvalue lower than 0.05. Enrichment analysis of the differential expressed genes was done by Novogene which used the clusterProfiler 4 software for enrichment analysis like GO enrichment. From the GO enrichment analysis results, the most significant 30 GO Terms were selected for display. If the results are less than 30, all Terms would be drawn. In the figure, the abscissa is the ratio of the number of differential genes linked with the GO Term to the total number of differential genes, and the ordinate is GO Term. The size of a point represents the number of genes annotated to a specific GO Term, and the colour from red to purple represents the significant level of the enrichment. Heatmaps were created using MORPHEUS from broad institute (https://software.broadinstitute.org/morpheus). Gene Set Enrichment Analysis (GSEA) 5,6 were used by analysing ATC defined gene expression compared to specific curated gene panels.7,8 Radar charts were created with function *radarchart* from fsmb package. Briefly, T cell related GO Terms were selected from GSEA and mean gene expression of these genes was calculated for each CAR-T cell treatment group, where gene expression in mock samples was taken as baseline. Percental expression difference to mock group was depicted as coloured line in the radar chart.

**Flow cytometry**

Cell phenotyping was done by flow cytometry using the MACSQuant Analyzer 10 (Miltenyi Biotec) and analyzed with MACSQuantifyTM Software v3.0.1, FlowJo v10.7.2 and GraphPad Prism9. The following fluorophore-conjugated anti-human monoclonal antibodies (mAbs) were used: ROR1, CD3, CD4, CD8, CD25, CD45, CD137, CD279, CD366, CD62L, CD45RO, FAP, CD29, with matched isotype controls from Miltenyi Biotec (Clones Table S3). For the analysis of TSHR expression, TSHR polyclonal antibody (BS-2087R) from Thermo Fisher Scientific with goat anti-rabbit IgG H&L FITC (ab6717) was employed. 7-AAD (Miltenyi) and DAPI (Merck Millipore) stainings were used for live/dead cell distinction. The frequency of CAR+ T cells was determined by staining with an anti-human EFGR antibody (PE conjugated, R&D Systems) as a surrogate (transduction) marker for CAR expression. Gating strategies are shown in Figure S1-4. Stainings were conducted as recommended by the manufacturer.

**CRISPR/Cas9-mediated knockout of ROR1**

Sequence design of the guide RNAs (gRNAs) targeting human *ROR1* was performed according to the CHOPCHOP online tool (https://chopchop.cbu.uib.no). Three different sequences were selected (Table S2.1). The gRNAs targeting the human *ROR1* locus as well as a random non-targeting scrambled (Scr) gRNA were cloned into lentiCRISPRv2 (# 52961, Addgene). Plasmid isolation was performed using the QIAprep Spin Miniprep Kit (Qiagen) kit. Isolated plasmids were tested for cloned gRNAs by Sanger sequencing (Eurofins Genomics) using human U6 primer (Table S2.2).

Lentiviral particles were produced as previously described.9 The target ATC cell lines (SW1736, 8505C and C643) were seeded into 12-well cell culture dishes and cultivated to 40-50 % confluency. Medium was removed and replaced by conditioned medium containing the viral particles and fresh medium in a 1:1 ratio. After 48 hrs, cells were trypsinized and further cultured in selection medium containing 1 µg/ml puromycin (Sigma Aldrich). Genomic DNA was isolated from transfected cells. Targeted regions were amplified by PCR using specific primers (Table S2.3) and the PCR products were purified using GenElute™ PCR Clean-up Kit (Sigma Aldrich) and analyzed by Sanger sequencing.

ROR1 negative cells were sorted via the BD FACS Aria II Flow Cytometry Cell Sorter, further cultivated and named ROR1-KO cells.

**Immunohistochemistry**

For immunohistochemistry, the ZytoChem Plus (HRP) Polymer Kit (POLHRP-100) was utilized. This kit includes the DAB Substrate Buffer (ZUC018-500), DAB Chromogen (DAB530) and the PostBlock reagent and HRP Polymer, which serves as the secondary antibody. The used antibody diluent (ZUC025-500) and Washing Buffer (ZUC020-2500) was also purchased from Zytomed. Hematoxylin for counterstaining was Mayer's acidic hematoxylin from Dr. K. Hollborn & Söhne (H02-1000). The detailed methodology for the processing of FFPE material, encompassing the steps of sectioning, deparaffinization, staining, counterstaining, and antibody staining, can be found in S2.

Formalin fixed and paraffin embedded thyroid tissue samples of ATC (n = 20) and paired healthy thyroid tissue (n = 20) were collected by the department of visceral, vascular and endocrine surgery and analyzed and archived at the institute of pathology at the university hospital Halle (Salle) (ethic: 2019-037, patients characteristics table S3).

**IHC staining protocol**

- **Sectioning**

FFPE material was sectioned into 1-3 µm thick slices and mounted onto coated Starfrost slides (Engelbrecht, REF: 11250).

- **Deparaffinization**

Slides were placed in an oven at 60°C for 40 minutes to remove paraffin. The following steps were then performed:

- 3x3 minutes in xylene
- 2x3 minutes in absolute ethanol
- 3 minutes in 50% ethanol
- 2 minutes in distilled water (ddH2O)
- 7 minutes in 3% hydrogen peroxide
- Brief rinse in ddH2O
- **Staining**
- Slides were placed in antigen retrieval buffer (pH 6 or 9) for 15 minutes, followed by cooling for 15 minutes at room temperature.
- Brief rinse in washing buffer
- Incubation with primary antibody dilution for 30 minutes
- 2x2 minutes in washing buffer
- Incubation with PostBlock Reagent for 15 minutes
- 2x2 minutes in washing buffer
- Incubation with HRP Polymer for 15 minutes
- 2x2 minutes in washing buffer
- Incubation with DAB solution for 10 minutes
- Brief rinse in washing buffer
- **Counterstaining**
- Brief rinse in ddH2O
- Incubation with hematoxylin for 30 seconds
- Blueing in running tap water for 5-10 minutes
- 1 minute each in 70% ethanol, 80% ethanol, absolute ethanol, and xylene
- Mounting with EUKITT®
- **Antibody Staining**

| **Antibody** | **Specificity** | **Cat-no** | **Dilution** | **pH (antigen retrieval buffer)** | **Manufacturer** |
| --- | --- | --- | --- | --- | --- |
| Rabbit anti-ROR1 (Clone D6T8C) | Human | 16540S | 1:50 | 6 | cell signaling |
| Rabbit anti-TSHR (Clone EPR19751) | Human | ab218108 | 1:1000 | 9 | Abcam |
| Rabbit anti-CD5 (Clone SP19) | Human | RBK023-05 | 1:25 | 6 | Zytomed |

**Viability assay in a monolayer system**

The ATC cells (WT, Scr and KO-ROR1) were seeded into 96-well plates. After 3 days ROR1 CAR T cells or control T cells were added in 1:2 or 1:5 effector to target ratios. After 24 hrs, co-cultures were washed with PBS, cells were fixed using TCA solution (Carl Roth) for 24 hrs and then stained with a 0,4 % SRB solution (Sigma Aldrich) for 45 min at RT. Plates were washed with 1% (v/v) acetic acid solution and dried overnight, before TRIS buffer (Carl Roth) was added for 30 min and the absorbance at 510 nm was measured with a Tecan SPARK multiplate reader. All samples were analyzed as technical triplicates.

**Viability assay in a 3D spheroid system**

2,000 ATC cells were seeded in 96-well low attachment plates (Corning), centrifuged for 5 min at 300xg and then incubated for 24 hrs to allow spheroid formation. After 2 days, ROR1 CAR T cells or control T cells stained with CellTracker™ Red CMTPX Dye (Thermo Fisher Scientific) were added and killing was monitored using the Incucyte live imaging system (Sartorius). ATC cell viability was quantified by luminescence imaging and analyzed with the Tecan SPARK multiplate reader. All samples were analyzed as technical quadruplicates.

**Cytokine measurement**

Supernatant was collected from co-cultures of ROR1 CAR T cells with ATC cell lines or controls followed by measuring cytokines using the MACSPlex Assay 12 human (Miltenyi Biotec) according to manufacturers’ instruction. All experiments were performed in triplicates.

***Ex vivo* imaging of fluorescently labelled CAR T cells**

To visualize the infiltration into the tumour, CAR T cell, were labelled with IVISense 680 Fluorescent Cell Labeling Dye (VivoTrack, Perkin Elmer) prior to injection into mice. After the tumour extraction the fluorescent signal of the CAR T cells was analysed on the surface and in the intersection of the tumours using the Living Image® 4.5.1 IVIS® Spectrum Imaging System (Perkin Elmer).

**Metastasis characterisation**

Metastasis was analysed at the end of the experiment, after the mice were euthanized using CO2 and cervical dislocation. The lungs were isolated first to prevent blood clotting. The liver, kidneys, and spleen were then isolated and placed into separate wells containing PBS solution. After a 10-minute incubation with 1.5 mg/mL of luciferin (Perkin Elmer) the organs were placed on an imaging and analysed with the Living Image® 4.5.1 IVIS® Spectrum Imaging System.

**Isolation and treatment of cancer associated fibroblasts (CAFs) from ATC/PDTC samples**

CAFs were isolated from patients with ATC and PDTC who had undergone a tumour resection (Prof. Dr. Kerstin Lorenz, UMH Halle, table S4). Tumour tissue was dissected with scissors in small pieces, centrifuged at 300 g for five minutes and then resuspended in RPMI 1640 medium containing 1 mg/mL collagenase IV (CellSystems, Troisdorf, Germany). The suspension was centrifuged at 200 g at 37°C for one hour. Cells were counted, seeded in cell culture flasks (750,000 per flask) and treated with either 1 µM lenvatinib or 0.01% (v/v) DMSO. Fibroblasts were analyzed after seven days by flow cytometry using the following fluorophore-conjugated antibodies: EpCAM-APC-Vio770, CD45-APC-Vio770, CD31-APC-Vio770, CD29PE-Vio770 (all Miltenyi Biotec) and hFAP-FITC (R&D Systems, Table S3). Nuclei were stained using DAPI (Merck Millipore). The gating strategy is shown in Figure S16.

**Supplementary Figures**

**S. Fig. 1.****ROR1 CAR T cell gating strategy**

First, single cells were gated (middle upper image), followed by the selection of viable 7AAD- cells (right upper image). Subsequently, the CD45+/CD3+ cells were gated for T cell selection by gating CD45+ (Vioblue) and CD3+ (FITC) cells (second row). hEGFR is selectively expressed on ROR1 CAR carrying T cells and its expression can therefore be used as a CAR selection and tracking marker (third row, left image). Further analyses included assessment of activation marker CD25-PE-Vio770. In the third row on the right the CD3+CD25+ activated ROR1 CAR T cells are gated. At the bottom, representative images of the corresponding Miltenyi REA Control isotype controls for FITC vs PE and FITC vs PE-Vio770 are displayed.

**S. Fig. 2. Gating strategy of ROR1 CAR T cell and ATC cell lines co-culture**

Single cells were first gated (middle upper image), followed by selection of viable 7AAD- cells (right upper image). By CD3-FITC vs ROR1-PE gating CD3+ ROR1 CAR T cells and ROR1+ ATC cells were detected simultaneously (second row). **(A)** Representative images of the corresponding Miltenyi REA Control isotype controls for FITC vs PE are displayed. **(B)** Gated ATC cells and ROR1 CAR T cells after 24h of co Incubation.

**S. Fig.3. Gating strategy of ROR1 CAR T cells isolated from the mouse blood including activation and exhaustion markers**

**(A)**Gating strategy for circulating ROR1 CAR T cells. Single cells were first gated (middle upper image), followed by selection of viable 7AAD- cells (right upper image). Subsequently, the CD45+/CD3+ cells were gated for T cell selection by gating CD45+ (Vioblue) and CD3+ (FITC) cells (second row, left and middle). hEGFR (PE) is selectively expressed on ROR1 CAR carrying T cells and its expression can therefore be used as a CAR selection and tracking marker (right second row). Second row shows representative images of the corresponding Miltenyi REA Control isotype controls for Vioblue, FITC and PE. Third row shows an exemplary sample of CD45, CD3 and hEGFR gating. **(B)** Representative images of the corresponding Miltenyi REA Control isotype controls (above) and exemplary gating (below) of the activation markers (i.e. CD25-PE‑Vio770, CD137-APC, CD69-APC-Vio770). **(C)** Representative images of the corresponding Miltenyi REA Control isotype controls (first and third image) and exemplary gating (second and fourth image) of the exhaustion markers (CD279-PE-Vio770, CD366-APC).

**S. Fig. 4. Gating strategy for ROR1 CAR T cell differentiation**

**(A)** Single cells were first gated (middle upper image), followed by selection of viable 7AAD- cells (right upper image). Second row shows representative images of the corresponding Miltenyi REA Control isotype controls for FITC, PE and PE‑Vio770 vs APC. **(B)** Exemplary gating of circulating ROR1 CAR Ts. Single cells were first gated (middle upper image), followed by selection of viable 7AAD- cells (right upper image). After single cell and viable cells gating, CD3+ FITC+ (left second row) and hEGFR+ PE (middle second row) ROR1 CAR T cells were gated. CD62L+PE-Vio770 vs CD45RO+APC gating was used to identify naïve (upper left corner), central memory (upper right corner), effector (lower left corner) and effector memory (lower right corner) ROR1 CAR T cells.

**S. Fig. 5. Bioinformatical analysis of fresh-frozen ATC and Goitre samples.**

**(A)** RNAseq was performed from 8 goitre and 12 ATC samples. Heatmap of all analysed samples based on FPKM values after hierarchical clustering (Analyzed by Morpheus, https://software.broadinstitute.org/morpheus/). **(B)** Gen set enrichment analyses (GSEA) of ATC-RNAseq results show enrichment (left) and downregulation (right) of known ATC regulated genes according to published and curated data from GSEA7. NES = normalized enrichment score. **(C)** Volcano plot of log2 mRNA fold changes plotted against the −log10 padj value for fresh frozen ATCs versus goiter. Only genes coding for cell surface proteins were analysed. Genes were filtered by TCSA (The Cancer Surfaceome Atlas, http://fcgportal.org/TCSA/Gene.php). ROR1 expression **(D)** and TSHR expression **(E)** separated by generated Clusters from Fig.1E, n ≥ 3, mean±SD, unpaired t-tests (*** p ≤ 0.001, ns p ≥ 0.05). **(F)** GSEA analysis of ATC-Clusters (Goitre-like, C1 and C2) for genes commonly upregulated in undifferentiated cancer according to published and curated data from GSEA8.

**S. Fig. 6. ROR1 and TSHR expression in different Thyroid carcinoma cohorts.**

**(A)** Relative *ROR1* expression within thyroid carcinomas (T = tumour, red, n = 393) and normal thyroid tissue (N = normal, grey, n = 59) with samples from the TCGA and GTEx data bank (Analysed by GEPIA2, http://gepia2.cancer-pku.cn/). Gene expression was determined by RNAseq. Thyroid carcinomas were further divided in a BRAF-like and RAS-like subgroup, as previously determined in TCGA Research portal.10 **(B)** Relative *ROR1* expression in BRAF V600E mutated (n = 13) and RAS mutated (n = 12) ATCs and PDTCs from the NCBI dataset (GSE76039) by an Affymetrix U133 plus 2.0 array, mean±SD, unpaired t-tests (** p ≤ 0.01). **(C)** Relative *TSHR* expression in ATC (n = 18) and PDTC (n = 17) samples from the NCBI dataset (GSE76039), mean±SD, unpaired t-tests (**** p ≤ 0.0001).

**S. Fig. 7.****ATC cell line characterization and model decision.**

**(A)** Mutational background of the ATC cell lines used for the *in vitro* and *in vivo* experiments. **(B)** Pearson’s correlation analyses of ROR1 surface expression level (MFI) and relative *ROR1* mRNA expression (RNAseq) in the different ATC and ovarian carcinoma cell lines. **(C)** FPKM (Fragments Per Kilobase of exon model per Million mapped fragments) values of *ROR1* and *TSHR* as determined by RNAseq in 3 different ATC cells lines. **(D)** Representative examples of TSHR surface expression in the indicated cell lines. The values in red represent mean fluorescent intensity (MFI) of the TSHR-FITC of each cell line. Grey value corresponds to isotype control MFI, red value – to the TSHR MFI for each cell line.

**S. Fig. 8.****Analysis of cytokine release after *in vitro* ROR1 CAR T cell treatment.**

TNF-α **(A)** and GM-CSF **(B)** concentration levels were measured by using the MACSPlex Cytokine 12 Kit from Miltenyi Biotec. The concentration of TNF-α and GM-CSF in the culture medium was analysed following the co-incubation of ATC cell lines (8505C, C643, SW1736) or the ROR1-negative A2780 cells with UTDs (untransduced T cells) and ROR1 CAR T cells, n=3 experiments, mean±SD, multiple unpaired t-tests (**** p ≤ 0.0001, *** p ≤ 0.001, * p < 0.05, ns p ≥ 0.05).

**S. Fig. 9.Changes of mouse body weight in % to the corresponding analysis in Fig.3.**

Body weight was assessed every week after injection of tumour cells. **(A)** – Experimental timeline Figure 3 A. **(B)** – Experimental timeline Figure 3 D. **(C)** – Experimental timeline Figure 3 G.

**S. Fig. 10. Bioinformatic analysis of activated ROR1 CD4+ CAR T cells treated with TKIs.**

**(A)** Principle component analysis of the NGS data of TKI-treated ROR1 CD4+ CAR T cells. Mock in grey, lenvatinib in blue, cabozantinib in purple, sorafenib in yellow. Upregulated **(B)** and downregulated **(C)** GO Term analysis of TKI treated ROR1 CD4+ CAR T cells vs untreated (mock) ROR1 CD4+ CAR T cells.

**S. Fig. 11. Bioinformatic analysis of activated ROR1 CD8+ CAR T cells treated with TKIs.**

**(A)** Principle component analysis of the NGS data of TKI-treated ROR1 CD8+ CAR T cells. Mock in grey, lenvatinib in blue, cabozantinib in purple, sorafenib in yellow. Upregulated **(B)** and downregulated **(C)** GO Term analysis of TKI treated ROR1 CD8+ CAR T cells vs untreated (mock) ROR1 CD8+ CAR T cells.

**S. Fig. 12. Bioinformatic analysis of activated ROR1 CD4+ CD8+ CAR T cells treated with TKIs.**

**(A)** Principle component analysis of the NGS data of TKI-treated ROR1 CD4+ CD8+ CAR T cells. Mock in grey, lenvatinib in blue, cabozantinib in purple, sorafenib in yellow. Upregulated **(B)** and downregulated **(C)** GO Term analysis of TKI treated ROR1 CD4+ CD8+ CAR T cells vs untreated (mock) ROR1 CD4+ CD8+ CAR T cells.

**S. Fig. 13. Flow cytometry analysis of the lenvatinib, cabozantinib and sorafenib effect on ROR1 expression in ATC cell lines.**

**(A-B)** Flow cytometry analysis for ROR1 expression on ATC cell lines 8505C, C643 and SW1736 treated with different TKIs for 72h.

**S. Fig. 14. Lysis efficiency of CAR T-cells with and without TKI-co treatment.**

An SRB-based viability assay was conducted, in which ROR1-expressing ATC cell lines 8505C **(A)**, C643 **(B)** and SW1736 **(C)** were co-incubated with UTD (untransduced T cells) or ROR1 CAR T-cells and different TKIs, n≥3, Mean±SD, unpaired t-test (* p < 0.05; ns ≥ 0.05).

**S. Fig. 15. ROR1 CAR T cell-mediated lysis of ATC metastasis in vivo.**

IVIS images of the metastasis in spleen **(A)** and kidney **(B)** of mice treated with either ROR1 CAR T cells (once or weekly), lenvatinib alone or lenvatinib combined with ROR1 CAR T cells. ATC cell lines carry a luciferace construct.The intensity of the tumour cell luminescence signal (shown in colour) is directly proportional to the number of viable tumour cells.

**S. Fig. 16. Gating strategy for CAFs analysis from the ATC sample.**

The cells were isolated from the cells from a primary anaplastic thyroid tumour. Representative FACS plot showing a gating strategy for analysing the immunosuppressive CAF S1 cells. First the debris were excluded (upper left image), with the following single cells (upper middle image) and viable cells (upper right image) gating. CD45-APC-Vio770, EPCAM-APC-Vio770 and CD31-APC-Vio770 were employed to exclude hematopoietic, epithelial, and endothelial cells respectively (lower left image). Staining for FAP-FITC and CD29-PE was used to identify the CAF-S1 population characterised by FAPhighCD29high expression.11,12

**Supplementary Tables**

**Table S1. Patient characteristics and their NGS clustering**

| **Number** | **NGS Cluster** | **Coding** | **Sex** | **Age, y** | **Diagnosis** | **TSHR expression, fpkm** | **ROR1 expression, fpkm** |
| --- | --- | --- | --- | --- | --- | --- | --- |
| #1 | C1 | 1-A | Male | 57 | FTC/ UTC | 13,38 | 7,30 |
| #2 | C1 | 5-A | Male | 50 | UTC | 9027,77 | 43,00 |
| #3 | C1 | 8-A | Male | 62 | UTC | 1526,78 | 13,53 |
| #4 | C2 | 4-A | Female | 69 | UTC-Relapse | 611,96 | 425,77 |
| #5 | C2 | 10-A | Male | 52 | ATC-Relapse | 6,15 | 192,74 |
| #6 | C2 | 14-A | Female | 69 | UTC | 2,64 | 558,90 |
| #7 | C2 | 16-A | Female | 76 | UTC | 4,95 | 138,70 |
| #8 | C2 | 18-A | Female | 77 | UTC | 3,45 | 504,95 |
| #9 | C2 | 22-A | Female | 76 | PDTC | 10,71 | 560,33 |
| #10 | Goitre-like | 7-A | Female | 59 | Squamous cell carcinoma | 11283,33 | 9,65 |
| #11 | Goitre-like | 17-A | Female | 70 | UTC | 16682,11 | 13,75 |
| #12 | Goitre-like | 19-A | Male | 69 | UTC | 12806,27 | 34,66 |
| #13 | Goitre | 4-S | Male | 53 | Goitre | 13243,66 | 1,61 |
| #14 | Goitre | 6-S | Female | 45 | Goitre | 16413,96 | 5,81 |
| #15 | Goitre | 7-S | Male | 46 | Goitre | 9468,68 | 0,00 |
| #16 | Goitre | 10-S | Female | 51 | Goitre | 13732,59 | 7,58 |
| #17 | Goitre | 11-S | Female | 71 | Goitre | 10937,46 | 0,00 |
| #18 | Goitre | 12-S | Female | 53 | Goitre | 14117,02 | 0,00 |
| #19 | Goitre | 14-S | Male | 53 | Goitre | 13046,15 | 16,13 |
| #20 | Goitre | 17-S | Female | 47 | Goitre | 7289,18 | 28,08 |

**Table S2. Oligos and primers**

**S2.1 CRISPR-Cas9 guide-RNA cloning**

| **Name** | **5’-3’** |
| --- | --- |
| **For ROR1 knockout:** |  |
| gRNA1-oligo-1 | CACCGTGGCAACCGCACCGTCTATA |
| gRNA1-oligo-2 | AAACTATAGACGGTGCGGTTGCCAC |
| gRNA2-oligo-1 | CACCGTCATCGCGACACAAGTCACG |
| gRNA2-oligo-2 | AAACCGTGACTTGTGTCGCGATGAC |
| gRNA3-oligo-1 | CACCGCGGATACAGTTCGCAGCTTC |
| gRNA3-oligo-2 | AAACGAAGCTGCGAACTGTATCCGC |
| **Control (Scramble gRNA):** |  |
| Scr-gRNA-oligo-1 | CACCGATATCCGGAATTCGCGCGAT |
| Scr-gRNA-oligo-2 | AAACATCGCGCGAATTCCGGATATC |

**S2.2 Primer for Sanger sequencing**

| **Name** | **5’-3’** |
| --- | --- |
| ROR1-gRNA1-sense | AGCCCAATTCCTTAGCCCAG |
| ROR1-gRNA1-antisense | ACACACCATCACCTCTCCCA |
| ROR1-gRNA2-sense | GCCTTGTCTGTTTCAGCACG |
| ROR1-gRNA2-antisense | TCCAGTTTTCCCTGTGCCAA |
| ROR1-gRNA3-sense | AGGGAGCAGGTTAGAGGGAC |
| ROR1-gRNA3-antisense | AGGGAAGGAATGGCGAACTG |
| **Standard primers:** |  |
| U6 promoter primer-sense | GAGGGCCTATTTCCCATGATT |

**S2.3 Quantitative PCR primer**

| **Name (for *homo sapiens*)** | **5’-3’** |
| --- | --- |
| *Gapdh*-real-sense | CAAGCTCATTTCCTGGTATGAC |
| *Gapdh*-real-antisense | GTGTGGTGGGGGACTGAGTGTGG |
| *ROR1*-real-sense | AGCGTGCGATTCAAAGGATT |
| *ROR1*-real-antisense | GACTGGTGCC GACGATGACT |

**Table S3. IHC patient samples and their TSHR and ROR1 expression**

| **Number** | **Sex** | **Age, y** | **Diagnosis** | **H-Score** | |
| --- | --- | --- | --- | --- | --- |
| **TSHR expression** | **ROR1 expression** |
| #1 | w | 78 | ATC | 10 | 20 |
| #2 | m | 76 | ATC | 0 | 40 |
| #3 | w | 61 | ATC | 0 | 90 |
| #4 | w | 75 | ATC | 5 | 10 |
| #5 | m | 47 | ATC | 0 | 50 |
| #6 | - | 66 | ATC | 0 | 10 |
| #7 | w | 61 | ATC | 0 | 5 |
| #8 | w | 67 | ATC | 5 | 130 |
| #9 | m | 32 | ATC | 0 | 210 |
| #10 | m | 49 | ATC | 0 | 210 |
| #11 | w | 73 | ATC | 0 | 60 |
| #12 | m | 85 | ATC | 0 | 200 |
| #13 | w | 75 | ATC | 5 | 100 |
| #14 | m | 86 | ATC | 0 | 20 |
| #15 | m | 67 | ATC | 10 | 60 |
| #16 | m | 67 | ATC | 0 | 10 |
| #17 | m | 61 | ATC | 5 | 0 |
| #18 | w | 58 | ATC | 10 | 100 |
| #19 | w | 81 | ATC | 5 | 250 |
| #20 | w | 89 | ATC | 0 | 160 |
| #21 | w | 78 | control/normal thyroid tissue | 90 | 10 |
| #22 | m | 76 | control/normal thyroid tissue | 30 | 0 |
| #23 | w | 61 | control/normal thyroid tissue | 40 | 10 |
| #24 | w | 75 | control/normal thyroid tissue | 200 | 5 |
| #25 | m | 47 | control/normal thyroid tissue | 150 | 5 |
| #26 | - | 66 | control/normal thyroid tissue | 100 | 0 |
| #27 | w | 61 | control/normal thyroid tissue | 130 | 30 |
| #28 | w | 67 | control/normal thyroid tissue | 120 | 30 |
| #29 | m | 32 | control/normal thyroid tissue | 140 | 40 |
| #30 | m | 49 | control/normal thyroid tissue | 80 | 50 |
| #31 | w | 73 | control/normal thyroid tissue | 30 | 10 |
| #32 | m | 85 | control/normal thyroid tissue | 70 | 10 |
| #33 | w | 75 | control/normal thyroid tissue | 70 | 5 |
| #34 | m | 86 | control/normal thyroid tissue | 80 | 0 |
| #35 | m | 67 | control/normal thyroid tissue | 70 | 5 |
| #36 | m | 67 | control/normal thyroid tissue | 180 | 0 |
| #37 | m | 61 | control/normal thyroid tissue | 120 | 5 |
| #38 | w | 58 | control/normal thyroid tissue | 220 | 0 |
| #39 | w | 81 | control/normal thyroid tissue | 60 | 10 |
| #40 | w | 89 | control/normal thyroid tissue | 120 | 5 |

**Table S4. Patient list for CAFs isolation**

| **Patient ID** | **Sex** | **Age, y** | **Histology** |
| --- | --- | --- | --- |
| #41 | m | 77 | ATC/PDTC |
| #42 | m | 59 | ATC/PDTC |
| #43 | m | 78 | ATC/PDTC |
| #44 | f | 85 | ATC/PDTC |
| #45 | f | 73 | ATC/PDTC |
| #46 | f | 58 | PDTC |

**Table S5. Flow cytometry antibodies**

| **Antibody** | **Clone** | **Manufacturer** |
| --- | --- | --- |
| hCD3 FITC | REA613 | Miltenyi Biotec |
| hCD4 VioGreen | REA623 | Miltenyi Biotec |
| hCD8 APC-Vio 770 | REA734 | Miltenyi Biotec |
| hCD45 VioBlue | REA747 | Miltenyi Biotec |
| mCD45 VioBlue | REA737 | Miltenyi Biotec |
| hCD25 PE-Vio 770 | REA570 | Miltenyi Biotec |
| hCD137 APC | REA765 | Miltenyi Biotec |
| hCD69-APC-Vio770 | REA824 | Miltenyi Biotec |
| hCD279 PE-Vio 770 | REA1165 | Miltenyi Biotec |
| hCD366 APC | REA635 | Miltenyi Biotec |
| hCD62L PE-Vio 770 | REA615 | Miltenyi Biotec |
| hCD45RO APC | REA611 | Miltenyi Biotec |
| hROR1 PE | 2A2 | Miltenyi Biotec |
| hROR1 APC | 2A2 | Miltenyi Biotec |
| hEGFR PE | # Hu1 | R&D Systems |
| hCD29 PE-Vio 770 | REA1060 | Miltenyi Biotec |
| hFAP Alexa Fluor® 488 | #427819 | R&D Systems |
| hCD45 APC-Vio770 | REA747 | Miltenyi Biotec |
| hCD31 APC-Vio770 | REA730 | Miltenyi Biotec |
| hEpCAM APC-Vio770 | REA764 | Miltenyi Biotec |

References for Supplementary Material

1. Rotermund A, Staege MS, Brandt S, et al. Luciferase Expressing Preclinical Model Systems Representing the Different Molecular Subtypes of Colorectal Cancer. *Cancers*. 2023;15(16):4122.

2. Love MI, Huber W, Anders S. Moderated estimation of fold change and dispersion for RNA-seq data with DESeq2. *Genome biology*. 2014;15:1-21.

3. Zhu A, Ibrahim JG, Love MI. Heavy-tailed prior distributions for sequence count data: removing the noise and preserving large differences. *Bioinformatics*. 2019;35(12):2084-2092.

4. Yu G, Wang LG, Han Y, He QY. clusterProfiler: an R package for comparing biological themes among gene clusters. *Omics*. May 2012;16(5):284-7. doi:10.1089/omi.2011.0118

5. Subramanian A, Tamayo P, Mootha VK, et al. Gene set enrichment analysis: a knowledge-based approach for interpreting genome-wide expression profiles. *Proc Natl Acad Sci U S A*. Oct 25 2005;102(43):15545-50. doi:10.1073/pnas.0506580102

6. Mootha VK, Lindgren CM, Eriksson K-F, et al. Martin Ridderstr å le Esa Laurila, et al. Pgc-1α-responsive genes involved in oxidative phosphorylation are coordinately downregulated in human diabetes. *Nature genetics*. 2003;34(3):267-273.

7. Rodrigues R, Roque L, Krug T, Leite V. Poorly differentiated and anaplastic thyroid carcinomas: chromosomal and oligo-array profile of five new cell lines. *British journal of cancer*. 2007;96(8):1237-1245.

8. Rhodes DR, Yu J, Shanker K, et al. Large-scale meta-analysis of cancer microarray data identifies common transcriptional profiles of neoplastic transformation and progression. *Proceedings of the National Academy of Sciences*. 2004;101(25):9309-9314. doi:doi:10.1073/pnas.0401994101

9. Chernyakov D, Groß A, Fischer A, et al. Loss of RANBP3L leads to transformation of renal epithelial cells towards a renal clear cell carcinoma like phenotype. *Journal of Experimental & Clinical Cancer Research*. 2021;40:1-18.

10. Agrawal N, Akbani R, Aksoy BA, et al. Integrated Genomic Characterization of Papillary Thyroid Carcinoma. *Cell*. 2014/10/23/ 2014;159(3):676-690. doi:https://doi.org/10.1016/j.cell.2014.09.050

11. Costa A, Kieffer Y, Scholer-Dahirel A, et al. Fibroblast heterogeneity and immunosuppressive environment in human breast cancer. *Cancer cell*. 2018;33(3):463-479. e10.

12. Licaj M, Mhaidly R, Kieffer Y, et al. Residual ANTXR1+ myofibroblasts after chemotherapy inhibit anti-tumor immunity via YAP1 signaling pathway. *Nature Communications*. 2024;15(1):1312.
